# Supplementary material for: POU2F2-oriented network promotes human gastric cancer metastasis
Source: HighWire-hosted journal article supplement (doi:10.1136/gutjnl-2014-308932), 2015-05-27
Supplement: gutjnl-2014-308932supp_tables.pdf [file gutjnl-2014-308932supp_tables.pdf]

**Table S1.** Prognostic factors in patients with gastric cancer by univariate analysis.

| Parameter                                 | n  | <i>P</i> value | Hazard Ratio | 95%<br>Confidence<br>Interval |
|-------------------------------------------|----|----------------|--------------|-------------------------------|
| <b>Gender</b>                             |    |                |              |                               |
| Male                                      | 62 | 0.479          | 1.224        | 0.700 - 2.141                 |
| Female                                    | 28 |                |              |                               |
| <b>Age</b>                                |    |                |              |                               |
| < 60                                      | 31 | 0.328          | 0.751        | 0.423 - 1.333                 |
| ≥ 60                                      | 59 |                |              |                               |
| <b>Location</b>                           |    |                |              |                               |
| Cardia                                    | 12 | 0.061          |              |                               |
| Fundus/body of stomach                    | 15 | 0.032          | 0.310        | 0.106 - 0.906                 |
| Antrum                                    | 55 | 0.246          | 0.582        | 0.233 - 1.454                 |
| Diffuse                                   | 8  | 0.015          | 0.373        | 0.169 - 0.825                 |
| <b>Tumor size</b>                         |    |                |              |                               |
| < 5cm                                     | 30 | 0.014*         | 0.456        | 0.244 - 0.852                 |
| ≥ 5cm                                     | 60 |                |              |                               |
| <b>Invasion depth</b>                     |    |                |              |                               |
| Without Infiltration into serous layer    | 11 | 0.047*         | 0.307        | 0.096 - 0.986                 |
| Infiltration into serous layer            | 79 |                |              |                               |
| <b>Lymph node metastasis</b>              |    |                |              |                               |
| negative                                  | 25 | 0.000*         | 0.169        | 0.067 - 0.426                 |
| positive                                  | 65 |                |              |                               |
| <b>Lymphatic and/or vascular invasion</b> |    |                |              |                               |
| negative                                  | 72 | 0.238          | 0.687        | 0.368 - 1.283                 |
| positive                                  | 18 |                |              |                               |
| <b>AJCC stage</b>                         |    |                |              |                               |
| I / II                                    | 25 | 0.001*         | 0.259        | 0.117 - 0.575                 |
| III/IV                                    | 65 |                |              |                               |
| <b>POU2F2 expression</b>                  |    |                |              |                               |
| Negative                                  | 31 | 0.000*         | 0.129        | 0.055 - 0.304                 |
| Positive                                  | 59 |                |              |                               |

**Table S2.** Multivariate analysis using the Cox proportional hazards model.

| Parameter                                 | n  | <i>P</i> value | Hazard Ratio | 95%<br>Confidence<br>Interval |
|-------------------------------------------|----|----------------|--------------|-------------------------------|
| Location                                  |    |                |              |                               |
| Cardia                                    | 12 | 0.440          |              |                               |
| Fundus/body of stomach                    | 15 | 0.112          | 0.401        | 0.130 - 1.236                 |
| Antrum                                    | 55 | 0.387          | 0.660        | 0.258 - 1.691                 |
| Diffuse                                   | 8  | 0.202          | 0.585        | 0.257 - 1.333                 |
| Tumor size                                |    |                |              |                               |
| < 5cm                                     | 30 |                |              |                               |
| ≥ 5cm                                     | 60 | 0.102          | 0.551        | 0.270 - 1.125                 |
| Invasion depth                            |    |                |              |                               |
| Without Infiltration into<br>serous layer | 11 | 0.943          | 1.049        | 0.283 - 3.885                 |
| Infiltration into serous layer            | 79 |                |              |                               |
| Lymph node metastasis                     |    |                |              |                               |
| negative                                  | 25 |                |              |                               |
| positive                                  | 65 | 0.819          | 0.823        | 0.156 - 4.340                 |
| AJCC stage                                |    |                |              |                               |
| I / II                                    | 25 |                |              |                               |
| III/IV                                    | 65 | 0.015*         | 0.349        | 0.149 - 0.816                 |
| POU2F2 expression                         |    |                |              |                               |
| Negative                                  | 31 |                |              |                               |
| Positive                                  | 59 | 0.023*         | 0.167        | 0.036 – 0.780                 |

**Table S3.** Sequence of primers used in the study.

| <b>Gene</b>     |                | <b>Primer Sequence (5'-3')</b> |
|-----------------|----------------|--------------------------------|
| GAPDH           | Forward primer | ATAGCACAGCCTGGATAGCAACGTAC     |
|                 | Reverse primer | CACCTTCTACAATGAGCTGCGTGTG      |
| POU2F2          | Forward primer | GCCGGAGCGGTCGAGTTCTG           |
|                 | Reverse primer | GTACAGCTCGTCCAGGCCGC           |
| ROBO1 promoter  | Forward primer | GACTTCAAATTAATATATATTAAGA      |
|                 | Reverse primer | TCCATCAATGACAATGGCGTCA         |
| POU2F2 promoter | Forward primer | GCTGAAATGGGAGCGCCGCAGC         |
|                 | Reverse primer | CTGAGGATCAGAGAGGTGAGCAGTA      |

**Table S4.** Interference targets of each gene involved in the study.

| <b>Gene Symbol</b>         | <b>NO.</b>           | <b>Target Seq</b>    |
|----------------------------|----------------------|----------------------|
| POU2F2<br>NM_002698        | POU2F2- shRNA1       | TCAACGATGCAGAGACTAT  |
|                            | POU2F2- shRNA2       | TACCGACACCAAATCTATT  |
|                            | POU2F2- shRNA3       | ACACAGACACCGAAAGAAA  |
|                            | POU2F2- shRNA4       | GTACAAAGATCAAGGCTGA  |
| ROBO1<br>NM_002941         | ROBO1- shRNA1        | GGCATATTTGGAAGTTACA  |
|                            | ROBO1- shRNA2        | AGACAAAGAGAACAAGCAA  |
|                            | ROBO1- shRNA3        | CACCAGCAAGGATGTATTT  |
|                            | ROBO1- shRNA4        | CCACCATTTTCATGGAAGAA |
| IKK- $\beta$<br>AF080158.1 | IKK- $\beta$ - shRNA | AAAGTGTCAGCTGTATCCT  |
